# Supplementary material for: SERPINE1 DNA Methylation Levels Quantified in Blood Cells at Five Years of Age Are Associated with Adiposity and Plasma PAI-1 Levels at Five Years of Age
Source: MDPI journal article supplement (doi:10.3390/ijms231911833), 2022-10-05
Supplement: s1 [file s1]

**Supplementary Table S1.** Genomic localization of annotated CpG sites within *SERPINE1* gene locus

| CpGs       | Genomic Location    |
|------------|---------------------|
| cg20773815 | chr7: 100, 768, 975 |
| cg24539923 | chr7: 100, 769, 903 |
| cg19722814 | chr7: 100, 769, 933 |
| cg25826546 | chr7: 100, 770, 061 |
| cg20438404 | chr7: 100, 770, 193 |
| cg08506775 | chr7: 100, 770, 286 |
| cg02273392 | chr7: 100, 770, 415 |
| cg15874872 | chr7: 100, 770, 435 |
| cg20583316 | chr7: 100, 771, 476 |
| cg01971264 | chr7: 100, 773, 079 |
| cg08792542 | chr7: 100, 773, 718 |
| cg12584355 | chr7: 100, 773, 852 |
| cg11353706 | chr7: 100, 774, 811 |
| cg01975495 | chr7: 100, 779, 018 |
| cg02704552 | chr7: 100, 781, 178 |

Note : The genomic location of each of the CpG sites was reported using the GRCh37/hg19 version of human genome [26]. Abbreviation: CpGs, Cytosine-phosphate-Guanine.

**Supplementary Table S2.** Correlation map of DNA methylation levels in blood cells collected at 5 years of age in children (boys and girls) for 15 CpG sites annotated at *SERPINE1* locus.

| Boys and girls<br>n = 323 | 20773815 | 24539923 | 19722814         | 25826546      | 20438404      | 08506775         | 02273392     | 15874872      | 20583316     | 01971264         | 08792542         | 12584355     | 11353706      | 01975495         | 02704552         |
|---------------------------|----------|----------|------------------|---------------|---------------|------------------|--------------|---------------|--------------|------------------|------------------|--------------|---------------|------------------|------------------|
| Mean % (SD)               | (0.02)   | (0.01)   | (0.01)           | (0.01)        | (0.01)        | (0.02)           | (0.01)       | (0.01)        | (0.01)       | (0.01)           | (0.01)           | (0.01)       | (0.02)        | (0.04)           | (0.04)           |
| cg20773815                | 1        | 0.075    | <b>-0.122</b>    | 0.025         | -0.040        | <b>-0.196*</b>   | -0.017       | 0.030         | -0.016       | <b>0.153*</b>    | <b>0.166*</b>    | <b>0.123</b> | <b>0.161*</b> | -0.051           | 0.064            |
|                           |          | 0.176    | <b>0.029</b>     | 0.654         | 0.477         | <b>&lt;0.001</b> | 0.761        | 0.594         | 0.776        | <b>0.006</b>     | <b>0.003</b>     | <b>0.027</b> | <b>0.004</b>  | 0.361            | 0.255            |
| cg24539923                |          | 1        | <b>0.230*</b>    | 0.053         | -0.023        | <b>0.120</b>     | 0.056        | <b>0.140</b>  | 0.100        | <b>-0.122</b>    | <b>-0.122</b>    | 0.048        | 0.022         | <b>0.123</b>     | -0.010           |
|                           |          |          | <b>&lt;0.001</b> | 0.344         | 0.680         | <b>0.031</b>     | 0.312        | <b>0.012</b>  | 0.073        | <b>0.029</b>     | <b>0.028</b>     | 0.393        | 0.689         | <b>0.028</b>     | 0.852            |
| cg19722814                |          |          | 1                | <b>0.167*</b> | <b>0.134</b>  | 0.027            | 0.104        | 0.075         | 0.107        | <b>-0.273*</b>   | <b>-0.150*</b>   | 0.092        | 0.106         | <b>0.256*</b>    | 0.106            |
|                           |          |          |                  | <b>0.003</b>  | <b>0.016</b>  | 0.629            | 0.062        | 0.178         | 0.056        | <b>&lt;0.001</b> | <b>0.007</b>     | 0.099        | 0.056         | <b>&lt;0.001</b> | 0.058            |
| cg25826546                |          |          |                  | 1             | <b>0.145*</b> | 0.039            | 0.047        | 0.013         | <b>0.110</b> | <b>-0.114</b>    | -0.078           | -0.053       | <b>0.140</b>  | <b>0.149*</b>    | 0.037            |
|                           |          |          |                  |               | <b>0.009</b>  | 0.489            | 0.402        | 0.816         | <b>0.049</b> | <b>0.040</b>     | 0.160            | 0.345        | <b>0.012</b>  | <b>0.007</b>     | 0.503            |
| cg20438404                |          |          |                  |               | 1             | <b>-0.152*</b>   | <b>0.129</b> | 0.073         | 0.050        | -0.084           | -0.092           | 0.050        | 0.092         | -0.033           | 0.028            |
|                           |          |          |                  |               |               | <b>0.006</b>     | <b>0.021</b> | 0.189         | 0.370        | 0.134            | 0.100            | 0.374        | 0.099         | 0.551            | 0.618            |
| cg08506775                |          |          |                  |               |               | 1                | 0.001        | -0.019        | -0.018       | -0.071           | -0.014           | -0.050       | 0.050         | 0.092            | <b>-0.122</b>    |
|                           |          |          |                  |               |               |                  | 0.993        | 0.729         | 0.747        | 0.204            | 0.803            | 0.370        | 0.369         | 0.098            | <b>0.029</b>     |
| cg02273392                |          |          |                  |               |               |                  | 1            | <b>0.151*</b> | 0.054        | -0.108           | 0.016            | -0.076       | 0.003         | 0.014            | 0.079            |
|                           |          |          |                  |               |               |                  |              | <b>0.006</b>  | 0.333        | 0.052            | 0.773            | 0.174        | 0.958         | 0.807            | 0.155            |
| cg15874872                |          |          |                  |               |               |                  |              | 1             | -0.054       | -0.075           | -0.024           | 0.004        | 0.016         | 0.049            | -0.041           |
|                           |          |          |                  |               |               |                  |              |               | 0.330        | 0.178            | 0.673            | 0.936        | 0.773         | 0.383            | 0.459            |
| cg20583316                |          |          |                  |               |               |                  |              |               | 1            | <b>-0.162*</b>   | -0.058           | -0.071       | 0.021         | 0.016            | -0.076           |
|                           |          |          |                  |               |               |                  |              |               |              | <b>0.003</b>     | 0.302            | 0.204        | 0.703         | 0.775            | 0.171            |
| cg01971264                |          |          |                  |               |               |                  |              |               |              | 1                | <b>0.257*</b>    | 0.071        | 0.014         | -0.094           | 0.081            |
|                           |          |          |                  |               |               |                  |              |               |              |                  | <b>&lt;0.001</b> | 0.203        | 0.798         | 0.092            | 0.146            |
| cg08792542                |          |          |                  |               |               |                  |              |               |              |                  | 1                | 0.059        | 0.065         | 0.009            | 0.032            |
|                           |          |          |                  |               |               |                  |              |               |              |                  |                  | 0.287        | 0.241         | 0.869            | 0.566            |
| cg12584355                |          |          |                  |               |               |                  |              |               |              |                  |                  | 1            | 0.058         | <b>0.138</b>     | 0.098            |
|                           |          |          |                  |               |               |                  |              |               |              |                  |                  |              | 0.298         | <b>0.013</b>     | 0.080            |
| cg11353706                |          |          |                  |               |               |                  |              |               |              |                  |                  |              | 1             | <b>0.214*</b>    | 0.028            |
|                           |          |          |                  |               |               |                  |              |               |              |                  |                  |              |               | <b>&lt;0.001</b> | 0.619            |
| cg01975495                |          |          |                  |               |               |                  |              |               |              |                  |                  |              |               | 1                | <b>0.244*</b>    |
|                           |          |          |                  |               |               |                  |              |               |              |                  |                  |              |               |                  | <b>&lt;0.001</b> |
| cg02704552                |          |          |                  |               |               |                  |              |               |              |                  |                  |              |               |                  | 1                |

Note: CpG sites associated with adiposity (P-value < 0.05 before correction for multiple testing) are represented in red and CpG site associated with plasma PAI-1 levels is represented in blue. The first line of each CpG sites corresponds to the Pearson's partial correlation coefficient whereas the second line corresponds to the P-value of the association. Model adjusted for age, sex, batch effect and cell type. Significant results with P-value < 0.05 are in bold. \*Significant result with P-value < 0.010.

**Supplementary Table S3.** Correlation map of DNA methylation levels in blood cells collected at 5 years of age in girls for 15 CpG sites annotated at *SERPINE1* locus.

| Girls<br>n = 146<br>Mean %<br>(SD) | 20773815       | 24539923       | 19722814         | 25826546       | 20438404       | 08506775       | 02273392       | 15874872       | 20583316       | 01971264         | 08792542       | 12584355       | 11353706       | 01975495         | 02704552         |
|------------------------------------|----------------|----------------|------------------|----------------|----------------|----------------|----------------|----------------|----------------|------------------|----------------|----------------|----------------|------------------|------------------|
|                                    | 0.87<br>(0.02) | 0.06<br>(0.01) | 0.04<br>(0.01)   | 0.04<br>(0.01) | 0.03<br>(0.01) | 0.06<br>(0.02) | 0.02<br>(0.01) | 0.04<br>(0.01) | 0.03<br>(0.01) | 0.93<br>(0.01)   | 0.96<br>(0.01) | 0.93<br>(0.01) | 0.83<br>(0.03) | 0.30<br>(0.04)   | 0.80<br>(0.03)   |
| cg20773815                         | 1              | -0.006         | <b>-0.226*</b>   | -0.037         | -0.078         | <b>-0.164</b>  | -0.101         | -0.059         | -0.078         | <b>0.198</b>     | <b>0.228*</b>  | 0.138          | <b>0.249*</b>  | -0.085           | 0.159            |
|                                    |                | 0.939          | <b>0.006</b>     | 0.655          | 0.348          | <b>0.048</b>   | 0.227          | 0.478          | 0.352          | <b>0.017</b>     | <b>0.006</b>   | 0.096          | <b>0.002</b>   | 0.309            | 0.055            |
| cg24539923                         |                | 1              | <b>0.302*</b>    | -0.014         | -0.055         | <b>0.267*</b>  | 0.132          | 0.103          | 0.098          | <b>-0.211</b>    | -0.111         | 0.038          | -0.035         | 0.135            | 0.014            |
|                                    |                |                | <b>&lt;0.001</b> | 0.867          | 0.507          | <b>0.001</b>   | 0.111          | 0.218          | 0.239          | <b>0.010</b>     | 0.183          | 0.646          | 0.671          | 0.105            | 0.866            |
| cg19722814                         |                |                | 1                | <b>0.259*</b>  | 0.058          | 0.039          | 0.064          | 0.007          | 0.146          | <b>-0.295*</b>   | <b>-0.222*</b> | 0.072          | 0.155          | <b>0.316*</b>    | <b>0.187</b>     |
|                                    |                |                |                  | <b>0.002</b>   | 0.487          | 0.639          | 0.442          | 0.930          | 0.079          | <b>&lt;0.001</b> | <b>0.007</b>   | 0.389          | 0.061          | <b>&lt;0.001</b> | <b>0.024</b>     |
| cg25826546                         |                |                |                  | 1              | <b>0.235*</b>  | -0.011         | 0.077          | <b>0.179</b>   | 0.131          | <b>-0.204</b>    | -0.122         | -0.113         | <b>0.267*</b>  | <b>0.221*</b>    | 0.091            |
|                                    |                |                |                  |                | <b>0.004</b>   | 0.895          | 0.357          | <b>0.030</b>   | 0.114          | <b>0.013</b>     | 0.143          | 0.175          | <b>0.001</b>   | <b>0.007</b>     | 0.274            |
| cg20438404                         |                |                |                  |                | 1              | -0.158         | 0.022          | 0.029          | 0.039          | -0.083           | -0.148         | 0.064          | <b>0.201</b>   | -0.016           | -0.146           |
|                                    |                |                |                  |                |                | 0.057          | 0.789          | 0.731          | 0.641          | 0.317            | 0.075          | 0.440          | <b>0.015</b>   | 0.849            | 0.079            |
| cg08506775                         |                |                |                  |                |                | 1              | -0.025         | 0.008          | -0.034         | -0.140           | -0.094         | -0.058         | -0.064         | 0.060            | -0.152           |
|                                    |                |                |                  |                |                |                | 0.766          | 0.928          | 0.687          | 0.093            | 0.259          | 0.484          | 0.441          | 0.471            | 0.067            |
| cg02273392                         |                |                |                  |                |                |                | 1              | <b>0.196</b>   | 0.118          | -0.042           | 0.012          | -0.056         | 0.041          | 0.111            | 0.110            |
|                                    |                |                |                  |                |                |                |                | <b>0.018</b>   | 0.158          | 0.615            | 0.881          | 0.500          | 0.624          | 0.183            | 0.186            |
| cg15874872                         |                |                |                  |                |                |                |                | 1              | -0.104         | -0.067           | 0.026          | 0.012          | -0.075         | -0.004           | -0.054           |
|                                    |                |                |                  |                |                |                |                |                | 0.210          | 0.419            | 0.755          | 0.883          | 0.366          | 0.965            | 0.518            |
| cg20583316                         |                |                |                  |                |                |                |                |                | 1              | <b>-0.302*</b>   | -0.052         | -0.008         | 0.072          | 0.080            | -0.082           |
|                                    |                |                |                  |                |                |                |                |                |                | <b>&lt;0.001</b> | 0.533          | 0.924          | 0.388          | 0.339            | 0.323            |
| cg01971264                         |                |                |                  |                |                |                |                |                |                | 1                | <b>0.256*</b>  | 0.034          | -0.041         | -0.036           | 0.027            |
|                                    |                |                |                  |                |                |                |                |                |                |                  | <b>0.002</b>   | 0.682          | 0.621          | 0.670            | 0.742            |
| cg08792542                         |                |                |                  |                |                |                |                |                |                |                  | 1              | 0.087          | 0.144          | 0.006            | -0.004           |
|                                    |                |                |                  |                |                |                |                |                |                |                  |                | 0.297          | 0.082          | 0.940            | 0.958            |
| cg12584355                         |                |                |                  |                |                |                |                |                |                |                  |                | 1              | 0.034          | 0.100            | -0.001           |
|                                    |                |                |                  |                |                |                |                |                |                |                  |                |                | 0.683          | 0.228            | 0.995            |
| cg11353706                         |                |                |                  |                |                |                |                |                |                |                  |                |                | 1              | <b>0.221*</b>    | 0.015            |
|                                    |                |                |                  |                |                |                |                |                |                |                  |                |                |                | <b>0.007</b>     | 0.856            |
| cg01975495                         |                |                |                  |                |                |                |                |                |                |                  |                |                |                | 1                | <b>0.288*</b>    |
|                                    |                |                |                  |                |                |                |                |                |                |                  |                |                |                |                  | <b>&lt;0.001</b> |
| cg02704552                         |                |                |                  |                |                |                |                |                |                |                  |                |                |                |                  | 1                |

Note: CpG sites associated with adiposity (P-value < 0.05 before correction for multiple testing) are represented in red and CpG site associated with plasma PAI-1 levels is represented in blue. The first line of each CpG sites corresponds to the Pearson's partial correlation coefficient whereas the second line corresponds to the P-value of the association. Model adjusted for age, batch effect and cell type. Significant results with P-value < 0.05 are in bold. \*Significant result with P-value < 0.010.

**Supplementary Table S4.** Correlation map of DNA methylation levels in blood cells collected at 5 years of age in boys for 15 CpG sites annotated at *SERPINE1* locus.

| Boys<br>n = 177<br>Mean % (SD) | 20773815<br>0.87<br>(0.01) | 24539923<br>0.06<br>(0.01) | 19722814<br>0.04<br>(0.01) | 25826546<br>0.04<br>(0.01) | 20438404<br>0.03<br>(0.01) | 08506775<br>0.05<br>(0.02) | 02273392<br>0.02<br>(0.01) | 15874872<br>0.04<br>(0.01) | 20583316<br>0.03<br>(0.01) | 01971264<br>0.93<br>(0.01) | 08792542<br>0.95<br>(0.01) | 12584355<br>0.93<br>(0.01) | 11353706<br>0.83<br>(0.02) | 01975495<br>0.30<br>(0.05) | 02704552<br>0.79<br>(0.04) |
|--------------------------------|----------------------------|----------------------------|----------------------------|----------------------------|----------------------------|----------------------------|----------------------------|----------------------------|----------------------------|----------------------------|----------------------------|----------------------------|----------------------------|----------------------------|----------------------------|
| cg20773815                     | 1                          | <b>0.162</b>               | -0.011                     | 0.102                      | -0.004                     | <b>-0.223*</b>             | 0.055                      | 0.117                      | 0.041                      | 0.113                      | 0.106                      | 0.111                      | 0.075                      | -0.022                     | -0.008                     |
|                                |                            | <b>0.031</b>               | 0.881                      | 0.175                      | 0.956                      | <b>0.003</b>               | 0.471                      | 0.120                      | 0.592                      | 0.133                      | 0.159                      | 0.142                      | 0.319                      | 0.769                      | 0.920                      |
| cg24539923                     |                            | 1                          | <b>0.172</b>               | 0.105                      | 0.008                      | -0.007                     | 0.004                      | <b>0.177</b>               | 0.103                      | -0.050                     | -0.143                     | 0.047                      | 0.070                      | 0.112                      | -0.042                     |
|                                |                            |                            | <b>0.022</b>               | 0.164                      | 0.917                      | 0.931                      | 0.959                      | <b>0.019</b>               | 0.174                      | 0.512                      | 0.058                      | 0.533                      | 0.357                      | 0.137                      | 0.580                      |
| cg19722814                     |                            |                            | 1                          | 0.083                      | <b>0.208*</b>              | 0.036                      | 0.133                      | 0.143                      | 0.070                      | <b>-0.251*</b>             | -0.066                     | 0.126                      | 0.064                      | <b>0.214*</b>              | 0.055                      |
|                                |                            |                            |                            | 0.274                      | <b>0.006</b>               | 0.634                      | 0.077                      | 0.058                      | 0.352                      | <b>0.001</b>               | 0.382                      | 0.096                      | 0.400                      | <b>0.004</b>               | 0.465                      |
| cg25826546                     |                            |                            |                            | 1                          | 0.063                      | 0.057                      | 0.034                      | <b>-0.155</b>              | 0.092                      | -0.036                     | -0.047                     | -0.003                     | -0.001                     | 0.087                      | -0.026                     |
|                                |                            |                            |                            |                            | 0.407                      | 0.449                      | 0.650                      | <b>0.039</b>               | 0.223                      | 0.638                      | 0.535                      | 0.967                      | 0.988                      | 0.249                      | 0.728                      |
| cg20438404                     |                            |                            |                            |                            | 1                          | -0.145                     | <b>0.211*</b>              | 0.112                      | 0.059                      | -0.083                     | -0.040                     | 0.039                      | -0.003                     | -0.046                     | <b>0.155</b>               |
|                                |                            |                            |                            |                            |                            | 0.054                      | <b>0.005</b>               | 0.139                      | 0.435                      | 0.273                      | 0.599                      | 0.610                      | 0.970                      | 0.546                      | <b>0.039</b>               |
| cg08506775                     |                            |                            |                            |                            |                            | 1                          | 0.032                      | -0.037                     | -0.007                     | -0.028                     | 0.036                      | -0.059                     | 0.131                      | 0.111                      | -0.124                     |
|                                |                            |                            |                            |                            |                            |                            | 0.676                      | 0.624                      | 0.931                      | 0.707                      | 0.632                      | 0.435                      | 0.083                      | 0.143                      | 0.101                      |
| cg02273392                     |                            |                            |                            |                            |                            |                            | 1                          | 0.114                      | 0.006                      | <b>-0.157</b>              | 0.026                      | -0.086                     | -0.024                     | -0.052                     | 0.070                      |
|                                |                            |                            |                            |                            |                            |                            |                            | 0.131                      | 0.942                      | <b>0.037</b>               | 0.729                      | 0.253                      | 0.755                      | 0.488                      | 0.356                      |
| cg15874872                     |                            |                            |                            |                            |                            |                            |                            | 1                          | -0.012                     | -0.081                     | -0.069                     | -0.001                     | 0.102                      | 0.090                      | -0.030                     |
|                                |                            |                            |                            |                            |                            |                            |                            |                            | 0.869                      | 0.283                      | 0.364                      | 0.987                      | 0.177                      | 0.233                      | 0.690                      |
| cg20583316                     |                            |                            |                            |                            |                            |                            |                            |                            | 1                          | -0.052                     | -0.063                     | -0.127                     | -0.022                     | -0.030                     | -0.073                     |
|                                |                            |                            |                            |                            |                            |                            |                            |                            |                            | 0.489                      | 0.408                      | 0.091                      | 0.774                      | 0.694                      | 0.337                      |
| cg01971264                     |                            |                            |                            |                            |                            |                            |                            |                            |                            | 1                          | <b>0.256*</b>              | 0.101                      | 0.060                      | -0.137                     | 0.115                      |
|                                |                            |                            |                            |                            |                            |                            |                            |                            |                            |                            | <b>0.001</b>               | 0.179                      | 0.425                      | 0.068                      | 0.127                      |
| cg08792542                     |                            |                            |                            |                            |                            |                            |                            |                            |                            |                            | 1                          | 0.025                      | -0.014                     | 0.010                      | 0.051                      |
|                                |                            |                            |                            |                            |                            |                            |                            |                            |                            |                            |                            | 0.739                      | 0.850                      | 0.897                      | 0.498                      |
| cg12584355                     |                            |                            |                            |                            |                            |                            |                            |                            |                            |                            |                            | 1                          | 0.076                      | <b>0.169</b>               | <b>0.167</b>               |
|                                |                            |                            |                            |                            |                            |                            |                            |                            |                            |                            |                            |                            | 0.312                      | <b>0.025</b>               | <b>0.027</b>               |
| cg11353706                     |                            |                            |                            |                            |                            |                            |                            |                            |                            |                            |                            |                            | 1                          | <b>0.209*</b>              | 0.031                      |
|                                |                            |                            |                            |                            |                            |                            |                            |                            |                            |                            |                            |                            |                            | <b>0.005</b>               | 0.685                      |
| cg01975495                     |                            |                            |                            |                            |                            |                            |                            |                            |                            |                            |                            |                            |                            | 1                          | <b>0.216*</b>              |
|                                |                            |                            |                            |                            |                            |                            |                            |                            |                            |                            |                            |                            |                            |                            | <b>0.004</b>               |
| cg02704552                     |                            |                            |                            |                            |                            |                            |                            |                            |                            |                            |                            |                            |                            |                            | 1                          |

Note: CpG sites associated with adiposity (P-value < 0.05 before correction for multiple testing) are represented in red and CpG site associated with plasma PAI-1 levels is represented in blue. The first line of each CpG sites corresponds to the Pearson's partial correlation coefficient whereas the second line corresponds to the P-value of the association. Model adjusted for age, batch effect and cell type. Significant results with P-value < 0.05 are in bold. \*Significant result with P-value < 0.010.

**Supplementary Table S5.** Associations between plasma PAI-1 levels and adiposity markers in all children aged 5 years old with values of an interaction term between plasma PAI-1 levels and sex for each of the associations tested.

|                                                           | <b>Log<sub>10</sub> Waist<br/>circumference<sup>a</sup>,<br/>cm<br/>N = 341</b>                 | <b>Log<sub>10</sub> DXA<br/>trunk fat<sup>a</sup>,<br/>%<br/>N = 308</b>                       | <b>Log<sub>10</sub> DXA<br/>android fat<sup>a</sup>,<br/>%<br/>N = 308</b>                     | <b>Log<sub>10</sub> DXA<br/>total fat, <sup>a</sup> %<br/>N = 308</b>                          | <b>Log<sub>10</sub> Total<br/>skinfold<sup>ac</sup>,<br/>mm<br/>N = 291</b>                     | <b>BMI z-<br/>score<sup>a</sup><br/>N = 341</b>                                                 |
|-----------------------------------------------------------|-------------------------------------------------------------------------------------------------|------------------------------------------------------------------------------------------------|------------------------------------------------------------------------------------------------|------------------------------------------------------------------------------------------------|-------------------------------------------------------------------------------------------------|-------------------------------------------------------------------------------------------------|
| <b>Log<sub>10</sub> PAI-1<br/>plasma<br/>level, ng/ml</b> | r = 0.095<br>p = 0.081                                                                          | r = 0.108<br>p = 0.059                                                                         | r = 0.092<br>p = 0.109                                                                         | r = 0.104<br>p = 0.070                                                                         | r = 0.058<br>p = 0.287                                                                          | r = 0.036<br>p = 0.506                                                                          |
| <b>Interaction term</b>                                   |                                                                                                 |                                                                                                |                                                                                                |                                                                                                |                                                                                                 |                                                                                                 |
| <b>Log<sub>10</sub> PAI-1<br/>plasma<br/>level, ng/ml</b> | $\beta_{\text{PAI-1}}$ : 0.014<br>$\beta_{\text{inter}}$ : -0.008<br>$p_{\text{inter}}$ : 0.477 | $\beta_{\text{PAI-1}}$ : 0.018<br>$\beta_{\text{inter}}$ : 0.008<br>$p_{\text{inter}}$ : 0.725 | $\beta_{\text{PAI-1}}$ : 0.018<br>$\beta_{\text{inter}}$ : 0.005<br>$p_{\text{inter}}$ : 0.838 | $\beta_{\text{PAI-1}}$ : 0.014<br>$\beta_{\text{inter}}$ : 0.008<br>$p_{\text{inter}}$ : 0.675 | $\beta_{\text{PAI-1}}$ : 0.036<br>$\beta_{\text{inter}}$ : -0.026<br>$p_{\text{inter}}$ : 0.549 | $\beta_{\text{PAI-1}}$ : 0.218<br>$\beta_{\text{inter}}$ : -0.198<br>$p_{\text{inter}}$ : 0.570 |

Note: r is the Pearson's partial correlation coefficient.  $\beta_{\text{PAI-1}}$ : Regression coefficient of plasma PAI-1 levels in girls.  $\beta_{\text{inter}}$ : Regression coefficient of the interaction term (plasma PAI-1\*sex).  $p_{\text{inter}}$ : P-value of the interaction term. <sup>a</sup>Model adjusted for age, sex, batch effect and cell type heterogeneity. Abbreviations: BMI, body mass index; DXA, Dual-energy X-ray absorptiometry. <sup>c</sup>Total skinfolds thickness is the sum of biceps, triceps, subscapular and suprailiac skinfolds.

**Supplementary Table S6.** Associations between blood cells DNAm and adiposity markers and plasma PAI-1 levels in all children aged 5 years old and stratified by sex only for CpG sites with an interaction term.

|              | Adiposity markers                                       |                                                  |                                                    |                                                  |                                                     |                          | Log <sub>10</sub> PAI-1 plasma level, ng/ml <sup>b</sup> |
|--------------|---------------------------------------------------------|--------------------------------------------------|----------------------------------------------------|--------------------------------------------------|-----------------------------------------------------|--------------------------|----------------------------------------------------------|
|              | Log <sub>10</sub> Waist circumference <sup>a</sup> , cm | Log <sub>10</sub> DXA trunk fat <sup>a</sup> , % | Log <sub>10</sub> DXA android fat <sup>a</sup> , % | Log <sub>10</sub> DXA total fat <sup>a</sup> , % | Log <sub>10</sub> Total skinfold <sup>ac</sup> , mm | BMI z-score <sup>a</sup> |                                                          |
| All children |                                                         |                                                  |                                                    |                                                  |                                                     |                          |                                                          |
|              | N = 323                                                 | N = 297                                          | N = 297                                            | N = 297                                          | N = 322                                             | N = 323                  | N = 321                                                  |
| cg20773815   | r = -0.070<br>p = 0.219                                 | r = -0.051<br>p = 0.392                          | r = -0.089<br>p = 0.131                            | r = -0.044<br>p = 0.461                          | r = -0.117<br>p = 0.038                             | r = -0.059<br>p = 0.297  | r = 0.041<br>p = 0.469                                   |
| cg24539923   | r = -0.032<br>p = 0.566                                 | r = 0.004<br>p = 0.948                           | r = 0.008<br>p = 0.896                             | r = 0.023<br>p = 0.696                           | r = 0.011<br>p = 0.852                              | r = 0.031<br>p = 0.582   | r = -0.074<br>p = 0.194                                  |
| cg19722814   | r = -0.072<br>p = 0.203                                 | r = -0.076<br>p = 0.197                          | r = -0.057<br>p = 0.338                            | r = -0.049<br>p = 0.406                          | r = -0.052<br>p = 0.362                             | r = -0.064<br>p = 0.262  | r = -0.097<br>p = 0.088                                  |
| cg25826546   | r = -0.006<br>p = 0.921                                 | r = -0.096<br>p = 0.103                          | r = -0.088<br>p = 0.135                            | r = -0.102<br>p = 0.085                          | r = -0.035<br>p = 0.537                             | r = -0.052<br>p = 0.360  | r = -0.076<br>p = 0.179                                  |
| cg20438404   | r = -0.013<br>p = 0.824                                 | r = -0.029<br>p = 0.624                          | r = -0.017<br>p = 0.770                            | r = -0.053<br>p = 0.371                          | r = -0.034<br>p = 0.554                             | r = -0.028<br>p = 0.617  | r = 0.075<br>p = 0.183                                   |
| cg08506775   | r = 0.055<br>p = 0.333                                  | r = 0.033<br>p = 0.582                           | r = 0.084<br>p = 0.153                             | r = 0.070<br>p = 0.236                           | r = 0.096<br>p = 0.089                              | r = 0.083<br>p = 0.140   | r = 0.064<br>p = 0.261                                   |
| cg02273392   | r = -0.042<br>p = 0.463                                 | r = -0.019<br>p = 0.754                          | r = -0.006<br>p = 0.914                            | r = 0.001<br>p = 0.991                           | r = -0.054<br>p = 0.338                             | r = -0.036<br>p = 0.520  | r = -0.035<br>p = 0.538                                  |
| cg15874872   | r = -0.031<br>p = 0.589                                 | r = -0.007<br>p = 0.908                          | r = 0.028<br>p = 0.634                             | r = 0.011<br>p = 0.849                           | r = -0.046<br>p = 0.415                             | r = 0.001<br>p = 0.981   | r = 0.086<br>p = 0.129                                   |
| cg20583316   | r = 0.015<br>p = 0.796                                  | r = 0.053<br>p = 0.371                           | r = 0.063<br>p = 0.285                             | r = 0.055<br>p = 0.348                           | r = 0.064<br>p = 0.256                              | r = 0.031<br>p = 0.590   | r = 0.026<br>p = 0.642                                   |
| cg01971264   | r = -0.001<br>p = 0.992                                 | r = 0.124<br>p = 0.035                           | r = 0.082<br>p = 0.167                             | r = 0.094<br>p = 0.110                           | r = 0.071<br>p = 0.207                              | r = 0.036<br>p = 0.525   | r = 0.062<br>p = 0.275                                   |
| cg08792542   | r = -0.022<br>p = 0.699                                 | r = -0.001<br>p = 0.982                          | r = -0.017<br>p = 0.768                            | r = 0.000<br>p = 0.997                           | r = -0.016<br>p = 0.780                             | r = -0.016<br>p = 0.782  | r = 0.072<br>p = 0.202                                   |
| cg12584355   | r = 0.049<br>p = 0.387                                  | r = -0.017<br>p = 0.777                          | r = 0.066<br>p = 0.263                             | r = -0.054<br>p = 0.357                          | r = -0.031<br>p = 0.587                             | r = -0.040<br>p = 0.475  | r = -0.081<br>p = 0.155                                  |
| cg11353706   | r = -0.127<br>p = 0.024                                 | r = 0.777<br>p = -0.126                          | r = -0.130<br>p = 0.028                            | r = -0.107<br>p = 0.070                          | r = -0.085<br>p = 0.136                             | r = -0.085<br>p = 0.133  | r = 0.128<br>p = 0.023                                   |
| cg01975495   | r = -0.072<br>p = 0.203                                 | r = -0.030<br>p = 0.610                          | r = -0.013<br>p = 0.823                            | r = -0.048<br>p = 0.420                          | r = -0.049<br>p = 0.384                             | r = -0.053<br>p = 0.352  | r = 0.053<br>p = 0.352                                   |
| cg02704552   | r = 0.053<br>p = 0.349                                  | r = 0.610<br>p = 0.047                           | r = 0.024<br>p = 0.690                             | r = 0.041<br>p = 0.488                           | r = 0.020<br>p = 0.727                              | r = 0.063<br>p = 0.267   | r = -0.083<br>p = 0.145                                  |
| Girls        |                                                         |                                                  |                                                    |                                                  |                                                     |                          |                                                          |
|              | N = 146                                                 | N = 136                                          | N = 136                                            | N = 136                                          | N = 145                                             | N = 146                  | N = 144                                                  |
| cg25826546   | r = -0.054<br>P = 0.532                                 | r = -0.192<br>p = 0.030                          | r = -0.151<br>P = 0.089                            | r = -0.207<br>p = 0.019                          | r = -0.032<br>P = 0.711                             | r = -0.084<br>p = 0.326  |                                                          |
| cg11353706   | r = -0.258<br>p = 0.002                                 | r = -0.189<br>p = 0.032                          | r = -0.215<br>p = 0.015                            | r = -0.203<br>p = 0.021                          | r = -0.212<br>p = 0.013                             | r = -0.278<br>p < 0.001  |                                                          |
| cg01975495   | r = -0.174<br>p = 0.042                                 | r = -0.152<br>p = 0.086                          | r = -0.154<br>p = 0.082                            | r = -0.207<br>p = 0.019                          | r = -0.152<br>p = 0.076                             | r = -0.146<br>p = 0.088  |                                                          |
| cg02273392   | r = 0.109<br>p = 0.220                                  | r = 0.134<br>p = 0.133                           | r = 0.151<br>p = 0.090                             | r = 0.172<br>p = 0.052                           | r = 0.150<br>p = 0.090                              | r = 0.111<br>p = 0.212   |                                                          |
| cg19722814   |                                                         |                                                  |                                                    |                                                  |                                                     |                          | r = -0.056<br>p = 0.515                                  |
| Boys         |                                                         |                                                  |                                                    |                                                  |                                                     |                          |                                                          |
|              | N = 177                                                 | N = 161                                          | N = 161                                            | N = 161                                          | N = 177                                             | N = 177                  | N = 177                                                  |
| cg25826546   | r = 0.097<br>p = 0.233                                  | r = 0.043<br>p = 0.594                           | r = 0.016<br>p = 0.843                             | r = 0.044<br>p = 0.593                           | r = 0.021<br>p = 0.796                              | r = 0.002<br>p = 0.977   |                                                          |
| cg11353706   | r = 0.024                                               | r = 0.018                                        | r = 0.034                                          | r = 0.035                                        | r = 0.050                                           | r = 0.095                |                                                          |

|                   |                         |                         |                         |                         |                         |                         |                                       |
|-------------------|-------------------------|-------------------------|-------------------------|-------------------------|-------------------------|-------------------------|---------------------------------------|
|                   | p = 0.767               | p = 0.829               | p = 0.673               | p = 0.667               | p = 0.537               | p = 0.243               |                                       |
| <b>cg01975495</b> | r = 0.038<br>p = 0.645  | r = 0.081<br>0.319      | r = 0.125<br>p = 0.124  | r = 0.090<br>p = 0.269  | r = 0.022<br>p = 0.789  | r = 0.019<br>p = 0.817  |                                       |
| <b>cg02273392</b> | r = -0.155<br>p = 0.041 | r = -0.148<br>p = 0.063 | r = -0.146<br>p = 0.067 | r = -0.130<br>p = 0.102 | r = -0.172<br>p = 0.023 | r = -0.112<br>p = 0.139 |                                       |
| <b>cg19722814</b> |                         |                         |                         |                         |                         |                         | <b>r = -0.178</b><br><b>p = 0.021</b> |

Note: r is the Pearson's partial correlation coefficient. <sup>a</sup>Model adjusted for age, sex (only when tested in all children together), batch effect and cell type heterogeneity and significant result with P-value <0.017 are in bold (considering three independent groups of adiposity markers). <sup>b</sup>Model additionally adjusted for BMI and significant P-value < 0.050 are in bold. Abbreviations: BMI, body mass index; DXA, Dual-energy X-ray absorptiometry. <sup>c</sup>Total skinfolds thickness is the sum of biceps, triceps, subscapular and suprailiac skinfolds.

**Supplementary Table S7.** Interaction term between DNA methylation and sex and its association with adiposity markers and plasma PAI-1 levels.

| DNAm level (M-value) | Adiposity markers                               |                                                  |                                                 |                                                  |                                                    |                                                 | Log <sub>10</sub> PAI-1, pg/ml                   |
|----------------------|-------------------------------------------------|--------------------------------------------------|-------------------------------------------------|--------------------------------------------------|----------------------------------------------------|-------------------------------------------------|--------------------------------------------------|
|                      | Log <sub>10</sub> Waist circumference, cm       | Log <sub>10</sub> DXA trunk fat, %               | Log <sub>10</sub> DXA android fat, %            | Log <sub>10</sub> DXA total fat, %               | Log <sub>10</sub> Total skinfold <sup>a</sup> , mm | BMI z-score                                     |                                                  |
| cg20773815           | $\beta_{\text{met}}$ : -0.017                   | $\beta_{\text{met}}$ : -0.028                    | $\beta_{\text{met}}$ : -0.055                   | $\beta_{\text{met}}$ : -0.014                    | $\beta_{\text{met}}$ : -0.111                      | $\beta_{\text{met}}$ : -0.374                   | $\beta_{\text{met}}$ : 0.103                     |
|                      | $\beta_{\text{inter}}$ : 0.011                  | $\beta_{\text{inter}}$ : 0.026                   | $\beta_{\text{inter}}$ : 0.053                  | $\beta_{\text{inter}}$ : 0.006                   | $\beta_{\text{inter}}$ : 0.082                     | $\beta_{\text{inter}}$ : 0.175                  | $\beta_{\text{inter}}$ : -0.083                  |
|                      | $p_{\text{inter}}$ : 0.541                      | $p_{\text{inter}}$ : 0.482                       | $p_{\text{inter}}$ : 0.202                      | $p_{\text{inter}}$ : 0.864                       | $p_{\text{inter}}$ : 0.246                         | $p_{\text{inter}}$ : 0.758                      | $p_{\text{inter}}$ : 0.643                       |
| cg24539923           | $\beta_{\text{met}}$ : 0.002                    | $\beta_{\text{met}}$ : 0.011                     | $\beta_{\text{met}}$ : 0.003                    | $\beta_{\text{met}}$ : 0.014                     | $\beta_{\text{met}}$ : 0.042                       | $\beta_{\text{met}}$ : 0.258                    | $\beta_{\text{met}}$ : -0.040                    |
|                      | $\beta_{\text{inter}}$ : -0.009                 | $\beta_{\text{inter}}$ : -0.022                  | $\beta_{\text{inter}}$ : -0.002                 | $\beta_{\text{inter}}$ : -0.021                  | $\beta_{\text{inter}}$ : -0.075                    | $\beta_{\text{inter}}$ : -0.322                 | $\beta_{\text{inter}}$ : -0.055                  |
|                      | $p_{\text{inter}}$ : 0.379                      | $p_{\text{inter}}$ : 0.314                       | $p_{\text{inter}}$ : 0.928                      | $p_{\text{inter}}$ : 0.282                       | $p_{\text{inter}}$ : 0.066                         | $p_{\text{inter}}$ : 0.322                      | $p_{\text{inter}}$ : 0.592                       |
| cg19722814           | $\beta_{\text{met}}$ : -0.007                   | $\beta_{\text{met}}$ : -0.020                    | $\beta_{\text{met}}$ : -0.021                   | $\beta_{\text{met}}$ : -0.015                    | $\beta_{\text{met}}$ : -0.024                      | $\beta_{\text{met}}$ : -0.253                   | <b><math>\beta_{\text{met}}</math>: 0.003</b>    |
|                      | $\beta_{\text{inter}}$ : 0.001                  | $\beta_{\text{inter}}$ : 0.015                   | $\beta_{\text{inter}}$ : 0.022                  | $\beta_{\text{inter}}$ : 0.016                   | $\beta_{\text{inter}}$ : 0.015                     | $\beta_{\text{inter}}$ : 0.181                  | <b><math>\beta_{\text{inter}}</math>: -0.180</b> |
|                      | $p_{\text{inter}}$ : 0.869                      | $p_{\text{inter}}$ : 0.361                       | $p_{\text{inter}}$ : 0.223                      | $p_{\text{inter}}$ : 0.255                       | $p_{\text{inter}}$ : 0.614                         | $p_{\text{inter}}$ : 0.456                      | <b><math>p_{\text{inter}}</math>: 0.018</b>      |
| cg25826546           | $\beta_{\text{met}}$ : -0.009                   | <b><math>\beta_{\text{met}}</math>: -0.046</b>   | <b><math>\beta_{\text{met}}</math>: -0.043</b>  | <b><math>\beta_{\text{met}}</math>: -0.040</b>   | $\beta_{\text{met}}$ : -0.030                      | $\beta_{\text{met}}$ : -0.323                   | $\beta_{\text{met}}$ : -0.088                    |
|                      | $\beta_{\text{inter}}$ : 0.018                  | <b><math>\beta_{\text{inter}}</math>: 0.062</b>  | <b><math>\beta_{\text{inter}}</math>: 0.054</b> | <b><math>\beta_{\text{inter}}</math>: 0.053</b>  | $\beta_{\text{inter}}$ : 0.038                     | $\beta_{\text{inter}}$ : 0.374                  | $\beta_{\text{inter}}$ : 0.038                   |
|                      | $p_{\text{inter}}$ : 0.098                      | <b><math>p_{\text{inter}}</math>: 0.005</b>      | <b><math>p_{\text{inter}}</math>: 0.025</b>     | <b><math>p_{\text{inter}}</math>: 0.006</b>      | $p_{\text{inter}}$ : 0.356                         | $p_{\text{inter}}$ : 0.259                      | $p_{\text{inter}}$ : 0.718                       |
| cg20438404           | $\beta_{\text{met}}$ : 0.001                    | $\beta_{\text{met}}$ : -0.006                    | $\beta_{\text{met}}$ : 0.004                    | $\beta_{\text{met}}$ : -0.013                    | $\beta_{\text{met}}$ : -0.007                      | $\beta_{\text{met}}$ : -0.170                   | $\beta_{\text{met}}$ : 0.138                     |
|                      | $\beta_{\text{inter}}$ : -0.004                 | $\beta_{\text{inter}}$ : 0.001                   | $\beta_{\text{inter}}$ : -0.015                 | $\beta_{\text{inter}}$ : 0.008                   | $\beta_{\text{inter}}$ : -0.009                    | $\beta_{\text{inter}}$ : 0.165                  | $\beta_{\text{inter}}$ : -0.129                  |
|                      | $p_{\text{inter}}$ : 0.740                      | $p_{\text{inter}}$ : 0.979                       | $p_{\text{inter}}$ : 0.521                      | $p_{\text{inter}}$ : 0.677                       | $p_{\text{inter}}$ : 0.816                         | $p_{\text{inter}}$ : 0.613                      | $p_{\text{inter}}$ : 0.206                       |
| cg08506775           | $\beta_{\text{met}}$ : 0.004                    | $\beta_{\text{met}}$ : 0.004                     | $\beta_{\text{met}}$ : 0.007                    | $\beta_{\text{met}}$ : 0.006                     | $\beta_{\text{met}}$ : 0.020                       | $\beta_{\text{met}}$ : 0.149                    | $\beta_{\text{met}}$ : 0.002                     |
|                      | $\beta_{\text{inter}}$ : -0.003                 | $\beta_{\text{inter}}$ : -0.004                  | $\beta_{\text{inter}}$ : -0.002                 | $\beta_{\text{inter}}$ : -0.004                  | $\beta_{\text{inter}}$ : -0.016                    | $\beta_{\text{inter}}$ : -0.127                 | $\beta_{\text{inter}}$ : 0.025                   |
|                      | $p_{\text{inter}}$ : 0.320                      | $p_{\text{inter}}$ : 0.528                       | $p_{\text{inter}}$ : 0.734                      | $p_{\text{inter}}$ : 0.442                       | $p_{\text{inter}}$ : 0.188                         | $p_{\text{inter}}$ : 0.197                      | $p_{\text{inter}}$ : 0.432                       |
| cg02273392           | $\beta_{\text{met}}$ : 0.005                    | <b><math>\beta_{\text{met}}</math>: 0.018</b>    | $\beta_{\text{met}}$ : 0.018                    | <b><math>\beta_{\text{met}}</math>: 0.020</b>    | <b><math>\beta_{\text{met}}</math>: 0.025</b>      | $\beta_{\text{met}}$ : 0.135                    | $\beta_{\text{met}}$ : -0.022                    |
|                      | $\beta_{\text{inter}}$ : -0.015                 | <b><math>\beta_{\text{inter}}</math>: -0.037</b> | $\beta_{\text{inter}}$ : -0.034                 | <b><math>\beta_{\text{inter}}</math>: -0.035</b> | <b><math>\beta_{\text{inter}}</math>: -0.071</b>   | $\beta_{\text{inter}}$ : -0.382                 | $\beta_{\text{inter}}$ : -0.006                  |
|                      | $p_{\text{inter}}$ : 0.085                      | <b><math>p_{\text{inter}}</math>: 0.035</b>      | $p_{\text{inter}}$ : 0.076                      | <b><math>p_{\text{inter}}</math>: 0.021</b>      | <b><math>p_{\text{inter}}</math>: 0.028</b>        | $p_{\text{inter}}$ : 0.144                      | $p_{\text{inter}}$ : 0.939                       |
| cg15874872           | $\beta_{\text{met}}$ : -0.004                   | $\beta_{\text{met}}$ : -0.011                    | $\beta_{\text{met}}$ : 0.000                    | $\beta_{\text{met}}$ : -0.006                    | $\beta_{\text{met}}$ : -0.015                      | $\beta_{\text{met}}$ : -0.151                   | $\beta_{\text{met}}$ : 0.142                     |
|                      | $\beta_{\text{inter}}$ : 0.001                  | $\beta_{\text{inter}}$ : 0.018                   | $\beta_{\text{inter}}$ : 0.011                  | $\beta_{\text{inter}}$ : 0.014                   | $\beta_{\text{inter}}$ : -0.002                    | $\beta_{\text{inter}}$ : 0.298                  | $\beta_{\text{inter}}$ : -0.131                  |
|                      | $p_{\text{inter}}$ : 0.883                      | $p_{\text{inter}}$ : 0.382                       | $p_{\text{inter}}$ : 0.633                      | $p_{\text{inter}}$ : 0.426                       | $p_{\text{inter}}$ : 0.962                         | $p_{\text{inter}}$ : 0.335                      | $p_{\text{inter}}$ : 0.180                       |
| cg20583316           | $\beta_{\text{met}}$ : 0.008                    | $\beta_{\text{met}}$ : 0.014                     | $\beta_{\text{met}}$ : 0.013                    | $\beta_{\text{met}}$ : 0.002                     | $\beta_{\text{met}}$ : 0.029                       | $\beta_{\text{met}}$ : 0.154                    | $\beta_{\text{met}}$ : -0.003                    |
|                      | $\beta_{\text{inter}}$ : -0.012                 | $\beta_{\text{inter}}$ : -0.005                  | $\beta_{\text{inter}}$ : -0.005                 | $\beta_{\text{inter}}$ : 0.001                   | $\beta_{\text{inter}}$ : -0.007                    | $\beta_{\text{inter}}$ : -0.106                 | $\beta_{\text{inter}}$ : 0.052                   |
|                      | $p_{\text{inter}}$ : 0.292                      | $p_{\text{inter}}$ : 0.823                       | $p_{\text{inter}}$ : 0.973                      | $p_{\text{inter}}$ : 0.545                       | $p_{\text{inter}}$ : 0.875                         | $p_{\text{inter}}$ : 0.764                      | $p_{\text{inter}}$ : 0.638                       |
| cg01971264           | $\beta_{\text{met}}$ : 0.007                    | $\beta_{\text{met}}$ : 0.050                     | $\beta_{\text{met}}$ : 0.044                    | $\beta_{\text{met}}$ : 0.046                     | $\beta_{\text{met}}$ : 0.057                       | $\beta_{\text{met}}$ : 0.502                    | $\beta_{\text{met}}$ : -0.035                    |
|                      | $\beta_{\text{inter}}$ : -0.012                 | $\beta_{\text{inter}}$ : -0.031                  | $\beta_{\text{inter}}$ : -0.036                 | $\beta_{\text{inter}}$ : -0.044                  | $\beta_{\text{inter}}$ : -0.036                    | $\beta_{\text{inter}}$ : -0.641                 | $\beta_{\text{inter}}$ : 0.209                   |
|                      | $p_{\text{inter}}$ : 0.402                      | $p_{\text{inter}}$ : 0.299                       | $p_{\text{inter}}$ : 0.280                      | $p_{\text{inter}}$ : 0.094                       | $p_{\text{inter}}$ : 0.520                         | $p_{\text{inter}}$ : 0.154                      | $p_{\text{inter}}$ : 0.142                       |
| cg08792542           | $\beta_{\text{met}}$ : -0.018                   | $\beta_{\text{met}}$ : -0.006                    | $\beta_{\text{met}}$ : -0.002                   | $\beta_{\text{met}}$ : 0.006                     | $\beta_{\text{met}}$ : -0.051                      | $\beta_{\text{met}}$ : -0.376                   | $\beta_{\text{met}}$ : 0.034                     |
|                      | $\beta_{\text{inter}}$ : 0.030                  | $\beta_{\text{inter}}$ : 0.010                   | $\beta_{\text{inter}}$ : -0.006                 | $\beta_{\text{inter}}$ : -0.012                  | $\beta_{\text{inter}}$ : 0.083                     | $\beta_{\text{inter}}$ : 0.596                  | $\beta_{\text{inter}}$ : 0.130                   |
|                      | $p_{\text{inter}}$ : 0.067                      | $p_{\text{inter}}$ : 0.747                       | $p_{\text{inter}}$ : 0.864                      | $p_{\text{inter}}$ : 0.673                       | $p_{\text{inter}}$ : 0.177                         | $p_{\text{inter}}$ : 0.225                      | $p_{\text{inter}}$ : 0.401                       |
| cg12584355           | $\beta_{\text{met}}$ : 0.004                    | $\beta_{\text{met}}$ : -0.021                    | $\beta_{\text{met}}$ : -0.008                   | $\beta_{\text{met}}$ : -0.012                    | $\beta_{\text{met}}$ : -0.035                      | $\beta_{\text{met}}$ : -0.245                   | $\beta_{\text{met}}$ : -0.136                    |
|                      | $\beta_{\text{inter}}$ : 0.008                  | $\beta_{\text{inter}}$ : 0.031                   | $\beta_{\text{inter}}$ : 0.033                  | $\beta_{\text{inter}}$ : -0.008                  | $\beta_{\text{inter}}$ : 0.030                     | $\beta_{\text{inter}}$ : 0.079                  | $\beta_{\text{inter}}$ : 0.012                   |
|                      | $p_{\text{inter}}$ : 0.681                      | $p_{\text{inter}}$ : 0.435                       | $p_{\text{inter}}$ : 0.452                      | $p_{\text{inter}}$ : 0.815                       | $p_{\text{inter}}$ : 0.680                         | $p_{\text{inter}}$ : 0.891                      | $p_{\text{inter}}$ : 0.946                       |
| cg11353706           | <b><math>\beta_{\text{met}}</math>: -0.040</b>  | <b><math>\beta_{\text{met}}</math>: -0.065</b>   | <b><math>\beta_{\text{met}}</math>: -0.078</b>  | <b><math>\beta_{\text{met}}</math>: -0.054</b>   | <b><math>\beta_{\text{met}}</math>: -0.121</b>     | <b><math>\beta_{\text{met}}</math>: -1.153</b>  | $\beta_{\text{met}}$ : 0.136                     |
|                      | <b><math>\beta_{\text{inter}}</math>: 0.044</b> | <b><math>\beta_{\text{inter}}</math>: 0.066</b>  | <b><math>\beta_{\text{inter}}</math>: 0.081</b> | <b><math>\beta_{\text{inter}}</math>: 0.059</b>  | <b><math>\beta_{\text{inter}}</math>: 0.153</b>    | <b><math>\beta_{\text{inter}}</math>: 1.561</b> | $\beta_{\text{inter}}$ : 0.043                   |
|                      | <b><math>p_{\text{inter}}</math>: 0.001</b>     | <b><math>p_{\text{inter}}</math>: 0.020</b>      | <b><math>p_{\text{inter}}</math>: 0.009</b>     | <b><math>p_{\text{inter}}</math>: 0.018</b>      | <b><math>p_{\text{inter}}</math>: 0.004</b>        | <b><math>p_{\text{inter}}</math>: &lt;0.001</b> | $p_{\text{inter}}$ : 0.752                       |
| cg01975495           | <b><math>\beta_{\text{met}}</math>: -0.031</b>  | <b><math>\beta_{\text{met}}</math>: -0.060</b>   | <b><math>\beta_{\text{met}}</math>: -0.068</b>  | <b><math>\beta_{\text{met}}</math>: -0.056</b>   | <b><math>\beta_{\text{met}}</math>: -0.108</b>     | <b><math>\beta_{\text{met}}</math>: -0.739</b>  | $\beta_{\text{met}}$ : 0.035                     |
|                      | <b><math>\beta_{\text{inter}}</math>: 0.036</b> | <b><math>\beta_{\text{inter}}</math>: 0.085</b>  | <b><math>\beta_{\text{inter}}</math>: 0.104</b> | <b><math>\beta_{\text{inter}}</math>: 0.074</b>  | <b><math>\beta_{\text{inter}}</math>: 0.141</b>    | <b><math>\beta_{\text{inter}}</math>: 0.900</b> | $\beta_{\text{inter}}$ : 0.043                   |
|                      | <b><math>p_{\text{inter}}</math>: 0.002</b>     | <b><math>p_{\text{inter}}</math>: &lt;0.001</b>  | <b><math>p_{\text{inter}}</math>: &lt;0.001</b> | <b><math>p_{\text{inter}}</math>: &lt;0.001</b>  | <b><math>p_{\text{inter}}</math>: 0.001</b>        | <b><math>p_{\text{inter}}</math>: 0.011</b>     | $p_{\text{inter}}$ : 0.706                       |



|                   |                                 |                                |                                |                                |                                |                                |                                |
|-------------------|---------------------------------|--------------------------------|--------------------------------|--------------------------------|--------------------------------|--------------------------------|--------------------------------|
| <b>cg02704552</b> | $\beta_{\text{met}}$ : 0.008    | $\beta_{\text{met}}$ : -0.006  | $\beta_{\text{met}}$ : -0.020  | $\beta_{\text{met}}$ : 0.001   | $\beta_{\text{met}}$ : -0.018  | $\beta_{\text{met}}$ : 0.161   | $\beta_{\text{met}}$ : -0.133  |
|                   | $\beta_{\text{inter}}$ : -0.003 | $\beta_{\text{inter}}$ : 0.027 | $\beta_{\text{inter}}$ : 0.042 | $\beta_{\text{inter}}$ : 0.011 | $\beta_{\text{inter}}$ : 0.042 | $\beta_{\text{inter}}$ : 0.077 | $\beta_{\text{inter}}$ : 0.075 |
|                   | $p_{\text{inter}}$ : 0.819      | $p_{\text{inter}}$ : 0.276     | $p_{\text{inter}}$ : 0.128     | $p_{\text{inter}}$ : 0.614     | $p_{\text{inter}}$ : 0.357     | $p_{\text{inter}}$ : 0.833     | $p_{\text{inter}}$ : 0.513     |

Note:  $\beta_{\text{met}}$ : Regression coefficient of DNAm in girls.  $\beta_{\text{inter}}$ : Regression coefficient of the interaction term (DNAm\*sex).  $p_{\text{inter}}$ : P-value of the interaction term. For adiposity markers, regression models are adjusted for age, sex, batch effect and cell type heterogeneity. For PAI-1 plasma levels, models are additionally adjusted for BMI z-score. Significant results with P-value < 0.05 are in bold. <sup>a</sup>Total skinfolds is the sum of biceps, triceps, subscapular and suprailiac skinfolds thickness. Abbreviations: BMI, body mass index; DXA, Dual-energy X-ray absorptiometry.
